# Supplementary material
Source: publisher figshare collection journal article supplement (https://acs.figshare.com/ndownloader/files/4077526)
Supplement: Supplementary file 1 [file 4077526]

## Supporting Information for:

### Nitrite reduction mediated by heme models. Routes to NO and HNO ?

Julie L. Heinecke, Chosu Khin, Jose Clayston Melo Pereira, Sebastián A. Suárez, Alexei V. Iretskii, Fabio Doctorovich, and Peter C. Ford\*

#### Table of Contents

|                    |                                                                                                                                                                                                                                                 |
|--------------------|-------------------------------------------------------------------------------------------------------------------------------------------------------------------------------------------------------------------------------------------------|
| <b>Figure S-1</b>  | Example of the specialized Schlenk cuvette used for anaerobic spectroscopic studies.                                                                                                                                                            |
| <b>Scheme S-1</b>  | Mechanistic scheme considered for HNO production from the decomposition of AS, plus the reactions occurring at the electrode surface.                                                                                                           |
| <b>Table S-1</b>   | Reactions, rate laws, and rate constants that were used in the simulations for HNO production in the OAT reaction cycle.                                                                                                                        |
| <b>Scheme S-2</b>  | The OAT reaction is directly influenced by the competing “dead end” equilibria of both $\text{Fe}^{\text{III}}(\text{TMPS})(\text{CysS}^-)$ and the mono-hydroxo complex $\text{Fe}^{\text{III}}(\text{TMPS})(\text{H}_2\text{O})(\text{OH})$ . |
| <b>Figure S-2</b>  | Temporal spectral changes showing the reforming of $\text{Fe}^{\text{III}}(\text{TPPS})$ .                                                                                                                                                      |
| <b>Figure S-3</b>  | The absorbance temporal changes for the OAT reaction with $\text{Fe}^{\text{III}}(\text{TPPS})$ , nitrite, and varying concentrations of cysteine                                                                                               |
| <b>Figure S-4</b>  | The FTIR spectrum of the gas phase from the reaction of $\text{Fe}^{\text{III}}(\text{TPPS})$ , nitrite and tppts.                                                                                                                              |
| <b>Figure S-5</b>  | $^{31}\text{P}\{^1\text{H}\}$ -NMR spectra for the products of the reaction of Angeli's salt with tppts                                                                                                                                         |
| <b>Figure S-6</b>  | $^{31}\text{P}\{^1\text{H}\}$ -NMR spectrum for the 12 h $\text{Fe}^{\text{II}}(\text{TPPS})(\text{NO})$ back reaction (after OAT) at pH 5.81 (50 mM phosphate) in the presence of 1 mM tppts.                                                  |
| <b>Figure S-7</b>  | $^{31}\text{P}\{^1\text{H}\}$ -NMR spectra after 12 h for nitrite (5 mM) and tppts (1 mM) and the $\text{Fe}^{\text{II}}(\text{TPPS})(\text{NO})$ back reaction                                                                                 |
| <b>Figure S-8.</b> | A) Current intensity vs. time measured for three different concentrations of AS. B) Calibration curve for the maximum $[\text{HNO}]$ obtained from AS decomposition vs. measured current.                                                       |
| <b>Figure S-9</b>  | Current detected using the cobalt modified gold electrode from pH 5.81 buffered solutions prepared from $\text{Fe}^{\text{III}}(\text{TPPS})$ (8 $\mu\text{M}$ ), sodium nitrite (10 mM) and tppts.                                             |
| <b>Figure S-10</b> | DFT (B3LYP/6311+G**) computational results for the gas phase reaction of $\text{R}_3\text{P}$ ( $\text{R} = ^i\text{Pr}$ ) and NO.                                                                                                              |
| <b>Figure S-11</b> | Dependence of the initial rate for nitrite reduction by $\text{Fe}^{\text{II}}(\text{TPPS})$ on $[\text{NO}_2^-]$ (A) and $[\text{H}^+]$ (B).                                                                                                   |
| <b>Figure S-12</b> | DFT (unrestricted TPSS/TPSS/DGDZTVP) computed Fe-N-O bond angles (top) and Fe-NO bond lengths (bottom) for the complexes $\text{Fe}^{\text{II}}(\text{P})(\text{L})(\text{NO})$ .                                                               |

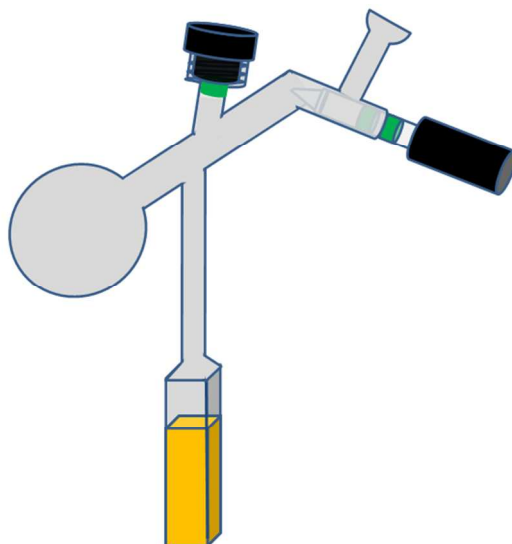

**Figure S-1.** Example of the specialized Schlenk-type cuvette used for the preparing anaerobic solutions on a vacuum line for the optical absorbance or photoluminescence spectroscopy and for kinetics measurements. The injection port on the top is used for additions of substrate needed to start reactions and for withdrawing gas samples for GC analysis. With a reaction solution volume (yellow) of 3.0 mL, the head-space of this cell was 28.0 mL

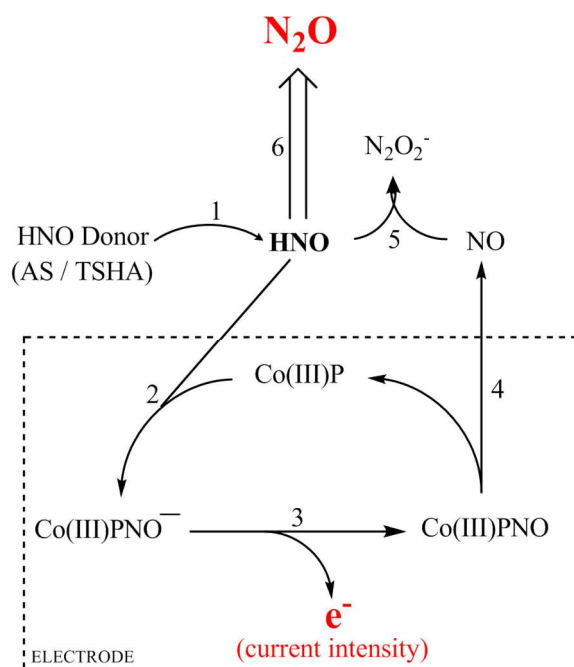

**Scheme S-1.** Mechanistic scheme considered for HNO production from the decomposition of AS, plus the reactions occurring at the electrode surface.

**Table S-1.** Reactions, rate laws, and rate constants that were used in the simulations for HNO production in the OAT reaction cycle (reactions numbered R1-R6 according to **Scheme S-1**).

|    | Reaction                                                                                                                       | Rate constant                                            | ref |
|----|--------------------------------------------------------------------------------------------------------------------------------|----------------------------------------------------------|-----|
| R1 | Angeli's salt $\longrightarrow$ HNO                                                                                            | $k_{dec} = 8.9 \times 10^{-4} \text{ s}^{-1}$            | 1   |
| R2 | $\text{Co}^{\text{III}}(\text{Por}) + \text{HNO} \longrightarrow \text{Co}^{\text{III}}(\text{Por})(\text{NO}^-) + \text{H}^+$ | $k_{on} = 3.1 \times 10^4 \text{ M}^{-1} \text{ s}^{-1}$ | 2   |
| R3 | $\text{Co}^{\text{III}}(\text{Por})(\text{NO}^-) \longrightarrow \text{Co}^{\text{III}}(\text{Por})(\text{NO}) + \text{e}^-$   | $k_{ox} = 0.089 \text{ s}^{-1}$                          | 2   |
| R4 | $\text{Co}^{\text{III}}(\text{Por})(\text{NO}) \longrightarrow \text{Co}^{\text{III}}(\text{Por}) + \text{NO}$                 | $k_{off} = 0.11 \text{ s}^{-1}$                          | 2   |
| R5 | $\text{HNO} + \text{NO} \longrightarrow \text{N}_2\text{O}_2^- + \text{H}^+$                                                   | $k_5 = 5.8 \times 10^6 \text{ M}^{-1} \text{ s}^{-1}$    | 3   |
| R6 | $2 \text{HNO} \longrightarrow \text{N}_2\text{O} + \text{H}_2\text{O}$                                                         | $k_{dim} = 8 \times 10^6 \text{ M}^{-1} \text{ s}^{-1}$  | 4   |

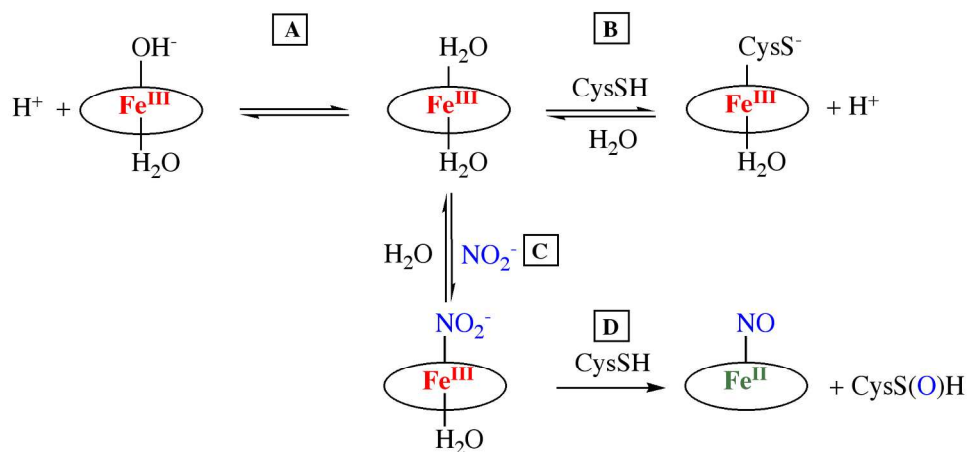

**Scheme S-2.** Illustration of the multiple reactions involving the ferric diaquo complex  $\text{Fe}^{\text{III}}(\text{TMPS})(\text{H}_2\text{O})_2$  (**3**). Formation of the nitrosyl complex  $\text{Fe}^{\text{III}}(\text{TMPS})(\text{NO})$  (**4**) by OAT to CysSH (step D) occurs after reversible formation of  $\text{Fe}^{\text{III}}(\text{TMPS})(\text{NO}_2^-)$  (**C**). The reaction is complicated by two “dead-end” equilibria, the formation of the monothiolate  $\text{Fe}^{\text{III}}(\text{TMPS})(\text{CysS}^-)$  (**B**) and formation of the monohydroxo complex  $\text{Fe}^{\text{III}}(\text{TMPS})(\text{H}_2\text{O})(\text{OH}^-)$  (**A**). (The pKa of **3** has been determined to be 6.9).<sup>5</sup>

<sup>1</sup> Miranda, K. M. *Coord. Chem. Rev.* **2005**, 249, 433-455

<sup>2</sup> Suarez, S. A.; Fonticelli, M. H.; Rubert, A. A.; de la Llave, E.; Scherlis, D.; Salvarezza, R. C.; Marti', M. A.; Doctorovich, F. A. *Inorg. Chem.* **2010**, 49, 6955-6966.

<sup>3</sup> Lyman, S. V.; Shafirovich, V.; Poskrebyshv, G. A.; *Inorg. Chem.* **2005**, 44, 5212-5221.

<sup>4</sup> Shafirovich, V.; Lyman, S. V. *Proc. Natl. Acad. Sci. (USA)*, **2002**, 99, 7340-7345.

<sup>5</sup> Wolak, M.; van Eldik, R. *J. Am. Chem. Soc.* **2005**, 127, 13312-13315.

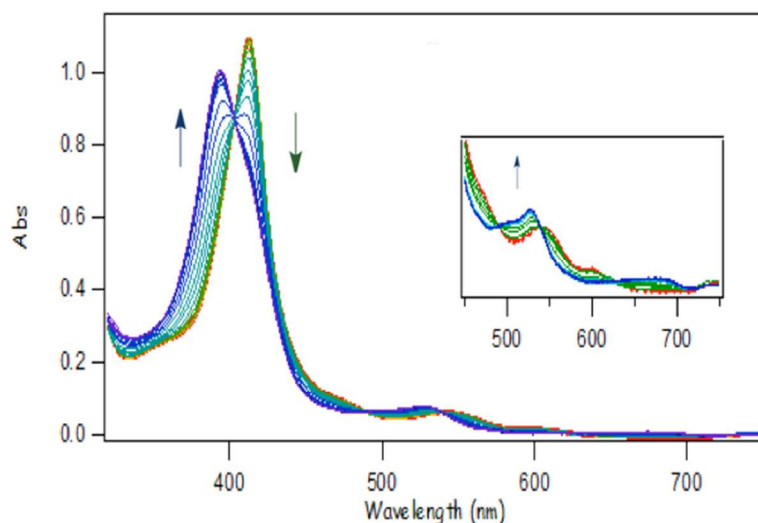

**Figure S-2.** Temporal spectral changes showing the reforming of  $\text{Fe}^{\text{III}}(\text{TPPS})$  from a deaerated pH 5.81 solution containing  $\text{Fe}^{\text{II}}(\text{TPPS})(\text{NO})$  prepared by the reaction of **1** ( $7.4 \times 10^{-6} \text{ M}$ ), tppts ( $6.6 \times 10^{-4} \text{ M}$ ) and  $\text{NaNO}_2$  ( $5.0 \times 10^{-3} \text{ M}$ ) at 298 K observed over a period of 7 h.

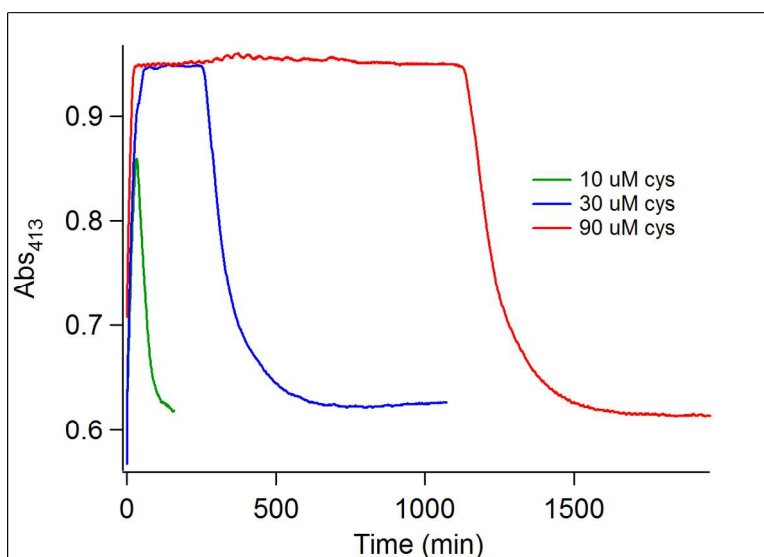

**Figure S-3.** The temporal absorbance changes at 413 nm for reaction of  $\text{Fe}^{\text{III}}(\text{TPPS})$  ( $8.6 \mu\text{M}$ ) and  $\text{NO}_2^-$  ( $10 \text{ mM}$ ) with varying concentrations of cysteine ( $10\text{--}90 \mu\text{M}$ ) at pH 5.81 (50 mM phosphate buffer) at  $25^\circ\text{C}$ . These show the fast formation of  $\text{Fe}^{\text{II}}(\text{TPPS})(\text{NO})$  ( $\lambda_{\text{max}} 413 \text{ nm}$ ) followed by a lag phase where that species is the principal chromophore in the solution, then eventual return to the initial spectrum of  $\text{Fe}^{\text{III}}(\text{TPPS})$ .

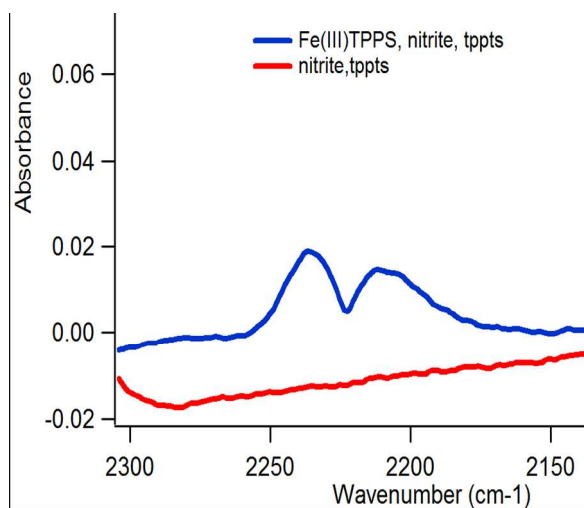

**Figure S-4.** Low resolution FTIR spectra of the headspace after the reaction of Fe<sup>III</sup>(TPPS) (8.6  $\mu$ M), NaNO<sub>2</sub> (10 mM) and tppts (1 mM) (blue) and of a control experiment containing only nitrite and tppts (red) (12 h reaction time). The former shows the characteristic P and R branches at 2211 cm<sup>-1</sup> and 2235 cm<sup>-1</sup> for the N<sub>2</sub>O stretching vibrations.

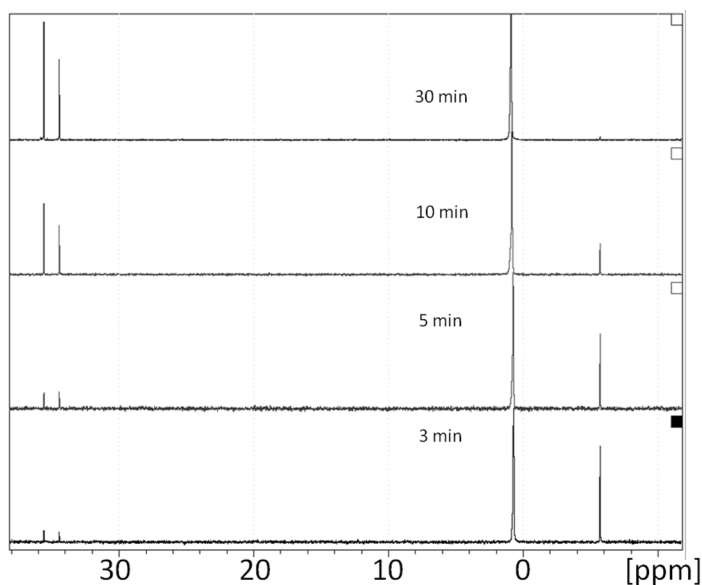

**Figure S-5.** Temporal dependence of the <sup>31</sup>P{<sup>1</sup>H}-NMR spectra for the reaction of Angeli's salt (HNO donor) (0.05 mmol) with tppts (0.05 mmol) in 0.6 mL at pH 5.81 solution (50 mM phosphate buffer, 10% D<sub>2</sub>O). The loss of tppts (-5.0 ppm) is accompanied by ~1:1 formation of tpptsO (34.5 ppm) and tppts(NH) (35.5 ppm) over a period of 30 min..

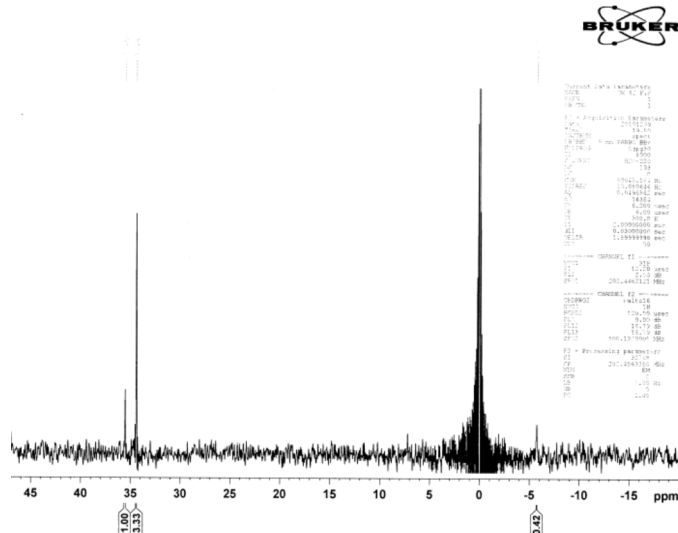

**Figure S-6.** The  $^{31}\text{P}\{^1\text{H}\}$ -NMR spectrum recorded for a pH 5.81 solution (50 mM phosphate) originally containing  $(\text{Fe}^{\text{III}}(\text{TPPS})$  (8  $\mu\text{M}$ ), nitrite (10 mM) and tppts (1 mM). The spectrum shows that nearly all the tppts (-5.1 ppm) has been consumed and indicates formation of tpptO (34.5 ppm) and tppts(NH) (35.5 ppm).

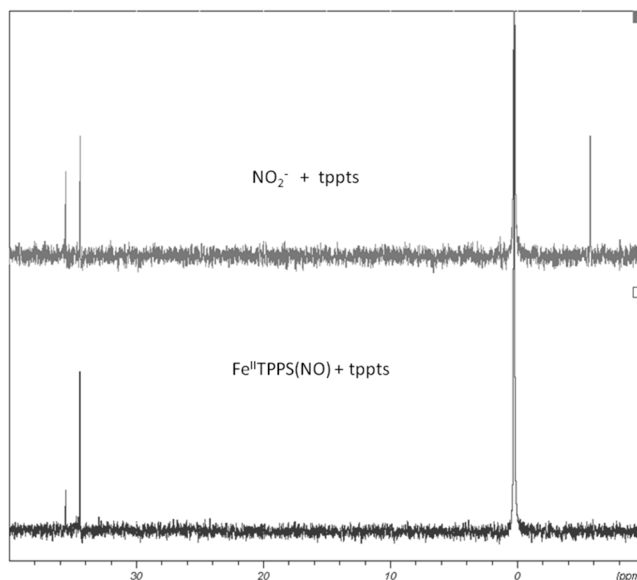

**Figure S-7.** *Top:*  $^{31}\text{P}\{^1\text{H}\}$ -NMR spectrum for the products of the reaction between nitrite (5 mM) and tppts (1 mM). *Bottom:* Spectrum for the products of the system composed of  $\text{Fe}^{\text{II}}(\text{TPPS})(\text{NO})$  (8  $\mu\text{M}$ ) nitrite (5 mM) and tppts (1 mM). Both are pH 5.81 (50 mM phosphate/10%  $\text{D}_2\text{O}$ ) and the spectra of these two systems both indicate formation of tpptsO (34.5 ppm) and of tppts(NH) (35.5 ppm).

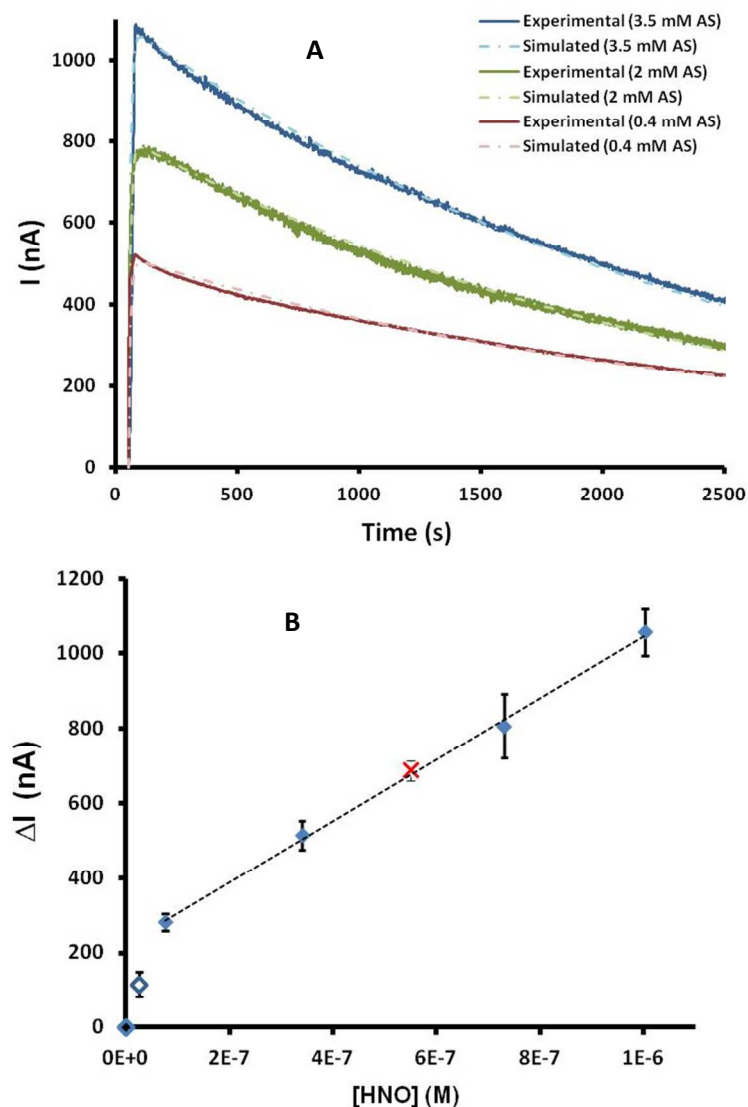

**Figure S-8.** A) Current intensity vs. time measured for three different concentrations of AS. In dotted lines are shown the corresponding simulations for the current intensity obtained from  $\text{Co(III)PNO}^-$  oxidation, by using the model shown in Scheme S-2. B) Calibration curve for the maximum  $[HNO]$  obtained from AS decomposition (as calculated in Scheme S-2) vs. measured current. Filled blue diamonds show the points used for the linear regression (2 or 3 independent measurements were done in each case); the red cross shows the maximum  $[HNO]$  generated by the reaction under study (for tppts 1.5 mM).

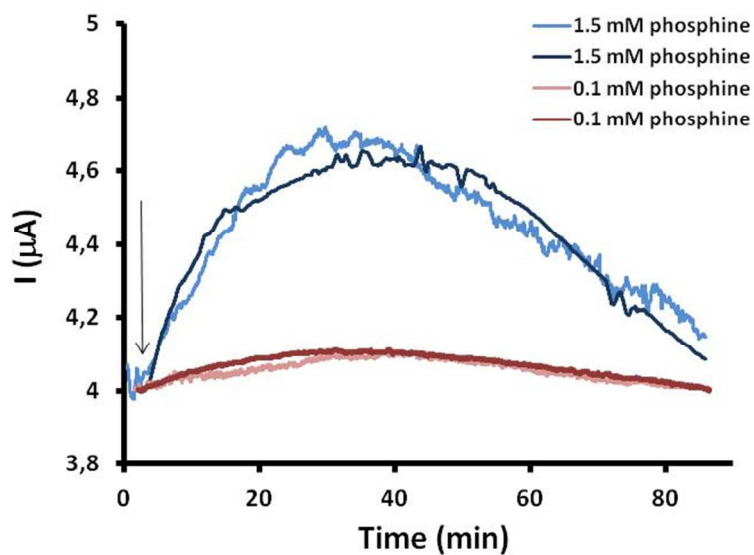

**Figure S-9.** Current detected using the cobalt modified gold electrode from pH 5.81 buffered solutions prepared from  $\text{Fe}^{\text{III}}(\text{TPPS})$  ( $8 \mu\text{M}$ ), sodium nitrite ( $10 \text{ mM}$ ) and tppts at  $1.5 \text{ mM}$  (blue) or  $0.1 \text{ mM}$  (pink).  $\text{NaNO}_3$   $0.1 \text{ M}$  was added as supporting electrolyte.

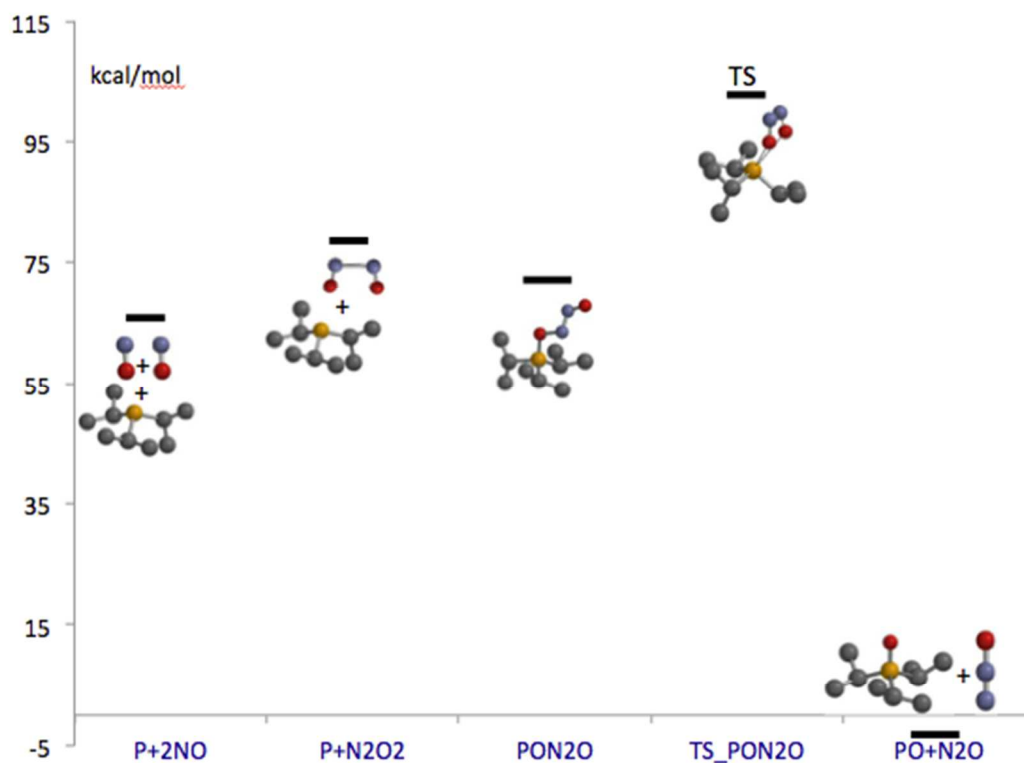

**Figure S-10:** DFT (B3LYP/6311+G\*\*) computational results for the gas phase reaction of  $\text{R}_3\text{P}$  ( $\text{R} = i\text{Pr}$ ) and  $\text{NO}$ .



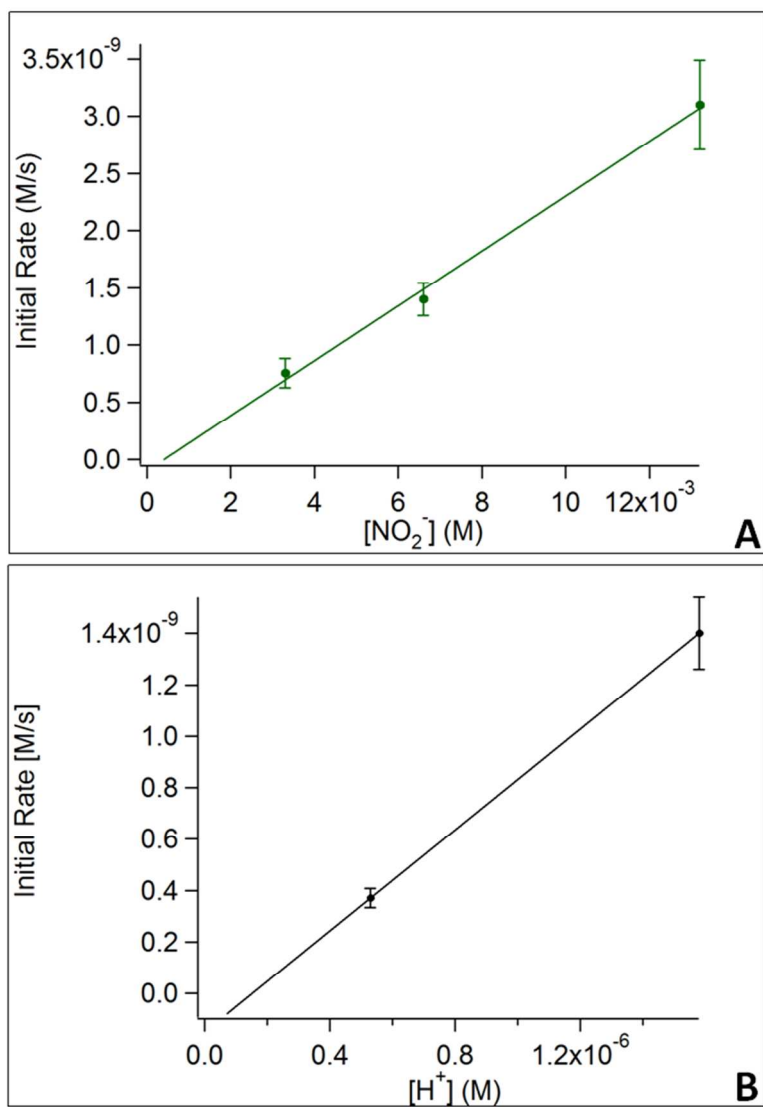

**Figure S-11.** Dependence of initial rate for nitrite reduction by  $\text{Fe}^{\text{II}}(\text{TPPS})$  on  $[\text{NO}_2^-]$  (A) and on  $[\text{H}^+]$  (B).

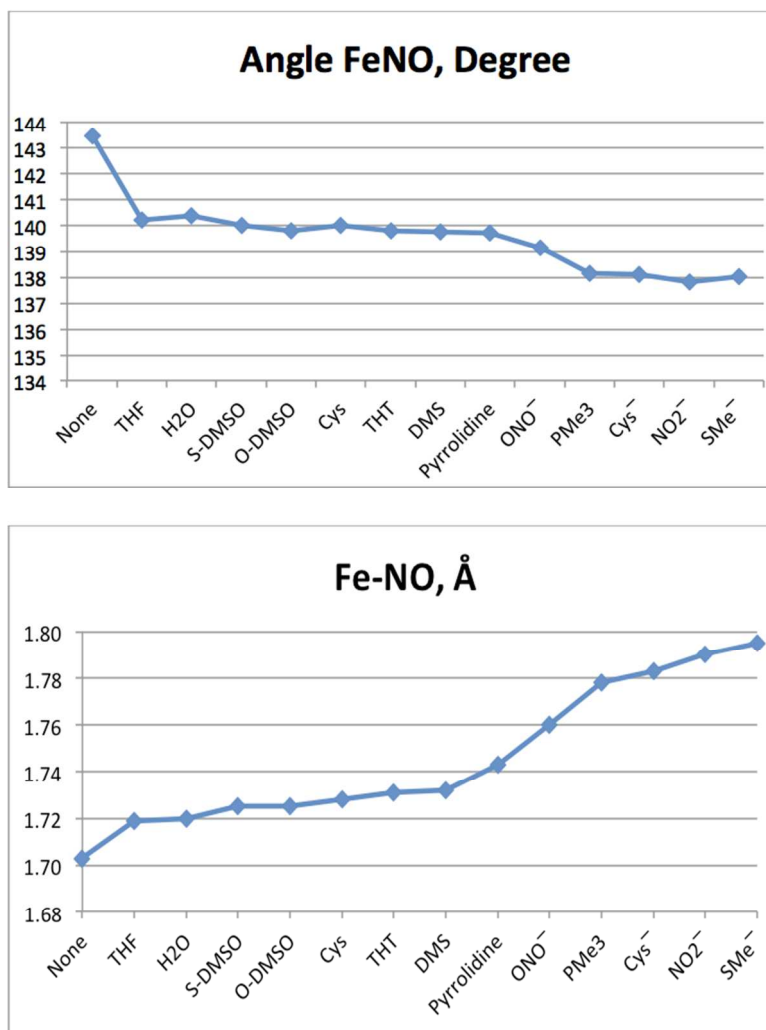

**Figure S-12.** DFT (unrestricted TPSSSTPSS/DGDZTVP) computed Fe-N-O bond angles (top) and Fe-NO bond lengths (bottom) for the complexes  $\text{Fe}^{\text{II}}(\text{P})(\text{L})(\text{NO})$ , where  $\text{P}^{2-}$  is the porphinato dianion, and L is the proximal ligand tetrahydrofuran (THF),  $\text{H}_2\text{O}$ , *S*- and *O*- dimethylsulfoxide (DMSO), cysteine (Cys), tetrahydrothiophene (THT), dimethylsulfide (DMS), pyrrolidine, *O*-nitrito, trimethylphosphine ( $\text{PMe}_3$ ), Cysteinato ( $\text{Cys}^-$ ), *N*-nitrito or methylsulfido.
